# Supplementary material for: Slot-die coating of electron transport layers for perovskite solar cells using water and butanol-based tin oxide dispersions
Source: Royal Society of Chemistry journal article supplement (doi:10.1039/d4ma00351a), 2024-01-01
Supplement: d4ma00351a1.pdf [file d4ma00351a1.pdf]

# Slot-die coating of electron transport layers for perovskite solar cells using water and butanol-based tin oxide dispersions

Anuja Vijayan,<sup>1</sup> Vishnu Vijayakumar,<sup>1</sup> Malin B. Johansson,<sup>1</sup> Masoud Karimipour,<sup>2</sup> Monica Lira-Cantu,<sup>2</sup> Byeong Jo Kim<sup>1</sup> and Gerrit Boschloo<sup>1\*</sup>

## SUPPORTING INFORMATION

### Experimental Section

#### Materials

Lead (II) Iodide (PbI<sub>2</sub>, 99.99%, trace metals basis) was purchased from TCI chemicals. Methyl ammonium iodide (MAI) was purchased from Great cell solar, N, N-dimethylformamide (DMF, anhydrous, 99.8%), dimethyl sulfoxide (DMSO, anhydrous, 99.8%), chlorobenzene (anhydrous, 99.8%), 4-tert-butylpyridine (TBP, 96%), acetonitrile (anhydrous, 99.8%), chlorobenzene (anhydrous, 99.8%) were purchased from Sigma-Aldrich. SnO<sub>2</sub> aqueous colloidal dispersion (15 wt % in H<sub>2</sub>O) was purchased from Alfa Aesar. Tin (IV) oxide nanoparticle ink was purchased from Avantama (Avantama N-30, 2.5wt%). Spiro-MeOTAD was purchased from Borun Chemicals. All chemicals are used as received without further purification.

#### Device fabrication

**Solar Cell Preparation:** ITO-coated glass substrates (ITO-15 from Optical Filters, UK; size 28 x 24 mm<sup>2</sup>) were etched with Zn powder and 2 M HCl to chemically remove the conducting layer from one side of the substrate. After, substrates were cleaned in an ultrasonic bath, starting with 2% RBS 50 (Sigma Aldrich) followed by deionized water, acetone and ethanol for 30 min each. Cleaned substrates were placed on slot-die coater at temperature 80 °C. (No UV-ozone treatment was required) The aqueous SnO<sub>2</sub> nanoparticle solution was diluted by deionized water (DI) in the ratio 1 to 6.5 mL (W-SnO<sub>2</sub>). The 2.5 wt % SnO<sub>2</sub> nanoparticle in butanol was diluted to 1 wt% (B-SnO<sub>2</sub>).

**Slot-die coating:** The slot-die coater unit (Compact sheet coater, FOM technologies, Denmark) was placed in a fume hood. The slot-die head is stationary and substrates are moving underneath with a speed of 80 cm/min to deposit W-SnO<sub>2</sub>. The pump rate was 90 µl/min, the slot width 2.8 cm and the shim gap was set to 80 µm.

To deposit B-SnO<sub>2</sub>, the speed of the hotplate was set to 60 cm/min, pump rate to 200 µl/min and shim gap to 80 µm.

After coating, substrates were immediately placed on a hotplate heated at 140 °C for 30 min. Just before perovskite deposition by spincoating, substrates were subjected to 20 minutes of UV-ozone treatment.

To prepare 1.2 M perovskite solution, methylammonium lead iodide (MAPbI<sub>3</sub>) precursor solutions were made from an equimolar mixture of MAI (286 mg) and PbI<sub>2</sub> (830 mg) in dimethylformamide (DMF)/dimethyl sulfoxide (DMSO) (4:1 by volume). The perovskite solution was spin coated on slot-die coated SnO<sub>2</sub>/ITO film, using 4000 rpm for 20s. During the spinning time between 7 and 10s, 150µL of chlorobenzene was dripped at the center of the substrate.

A 70 mM spiro-OMeTAD (Spiro) solution in chlorobenzene with additives such as 4-tert-butyl pyridine (TBP), 1.8 M Li-TFSI in acetonitrile and 0.25 M FK209 in acetonitrile<sup>1</sup> was deposited by spin coating at 2500 rpm for 30 s. The molar ratio of Spiro: TBP: Li-TFSI: FK209 was 1: 3.3: 0.5: 0.05.1

Finally, 80 nm thick gold contact was evaporated on the spiro surface.

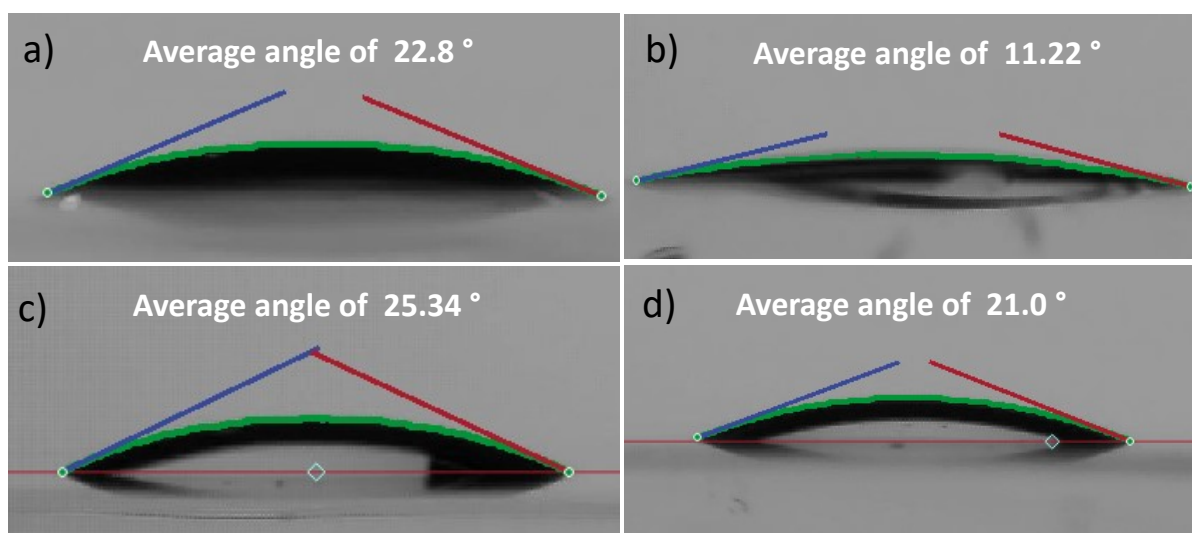

Figure S1: Contact angle of a) W-SnO<sub>2</sub> on ITO without prior cleaning b) After cleaning with DI water c) B-SnO<sub>2</sub> on ITO without prior cleaning d) After cleaning with DI water.

Figure S2: SEM cross-section images of perovskite layer on a) B-SnO<sub>2</sub> b) W-SnO<sub>2</sub>

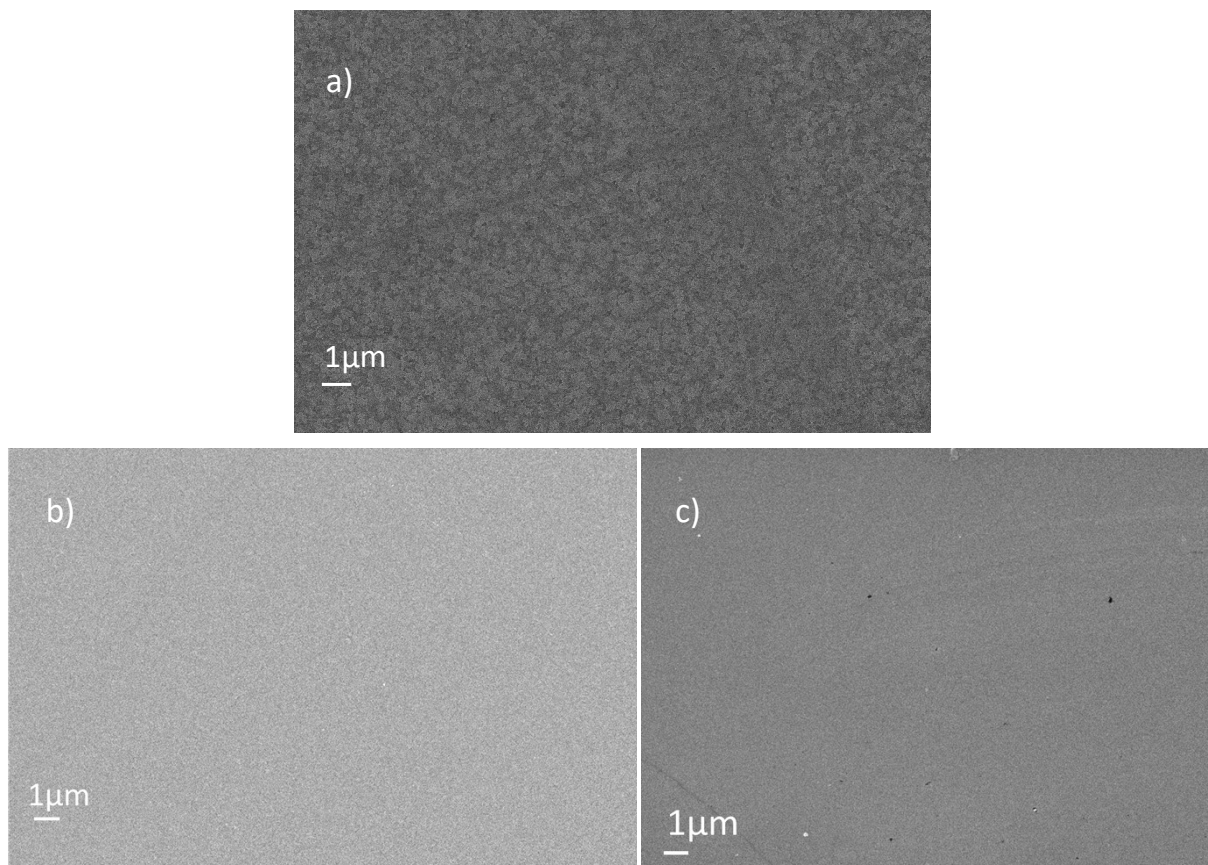

Figure S3: Scanning electron microscopy -top view images a) ITO substrate; b) B-SnO<sub>2</sub> on ITO ;c) W-SnO<sub>2</sub> on ITO.

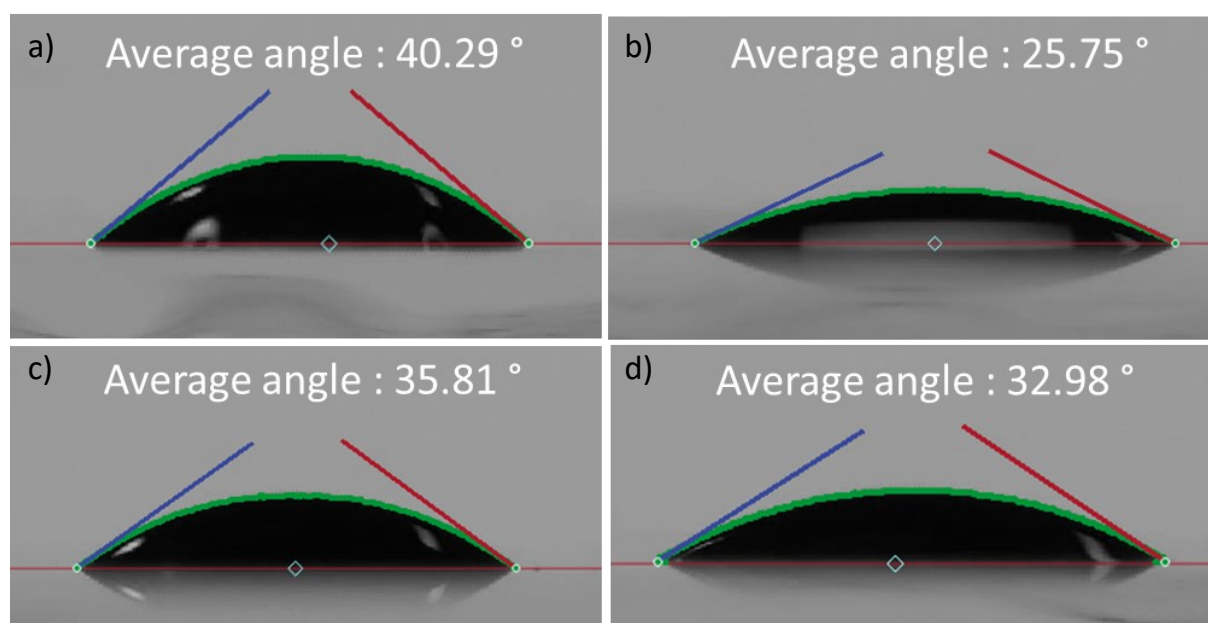

Figure S4: Contact angle of perovskite solution on a) W-SnO<sub>2</sub> without UV-ozone treatment b) W-SnO<sub>2</sub> with UV-ozone treatment c) B-SnO<sub>2</sub> without UV-ozone treatment d) B-SnO<sub>2</sub> with UV-ozone treatment

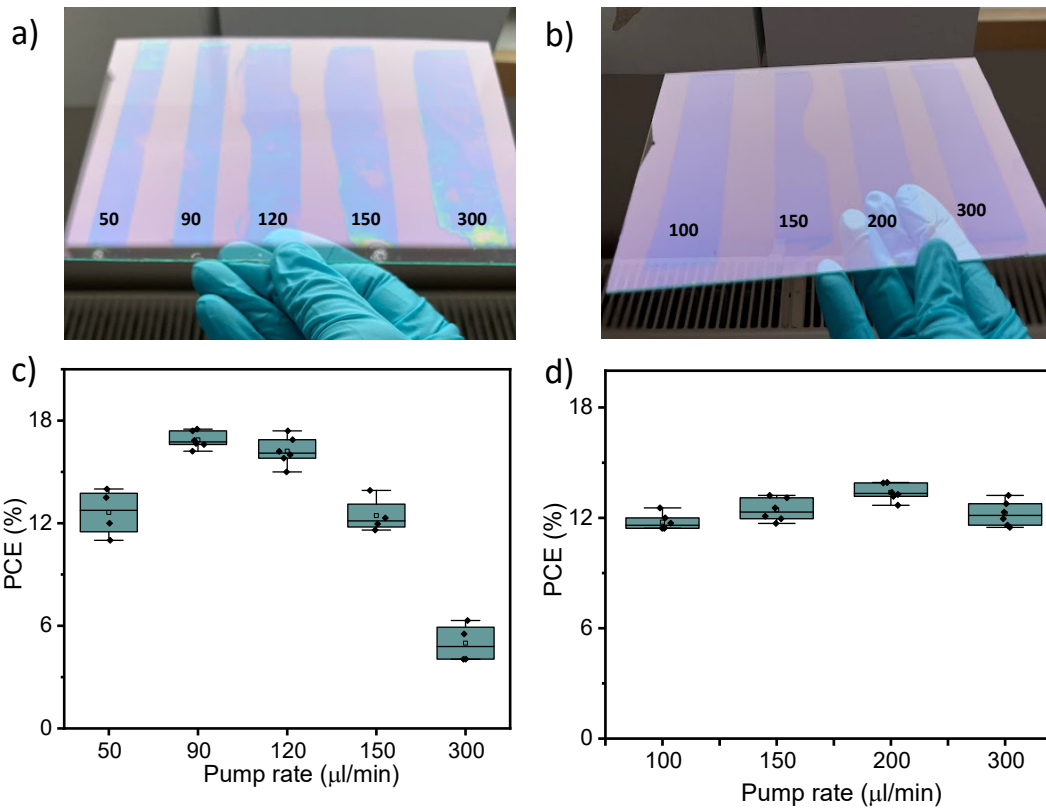

Figure S5: Images of slot die coated SnO<sub>2</sub> a) W-SnO<sub>2</sub> b) B-SnO<sub>2</sub> Corresponding power conversion efficiency v/s pump rate graph c) W-SnO<sub>2</sub> based cell d) B-SnO<sub>2</sub> based cell

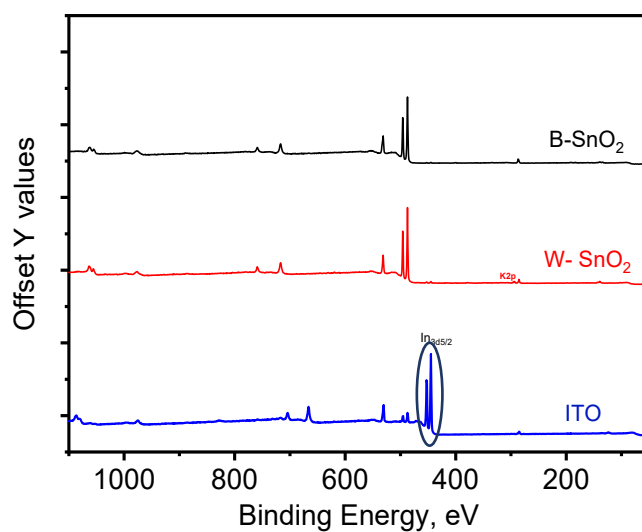

Figure S6: X-Ray Photoelectron spectroscopy of SnO<sub>2</sub> in comparison with bare ITO.

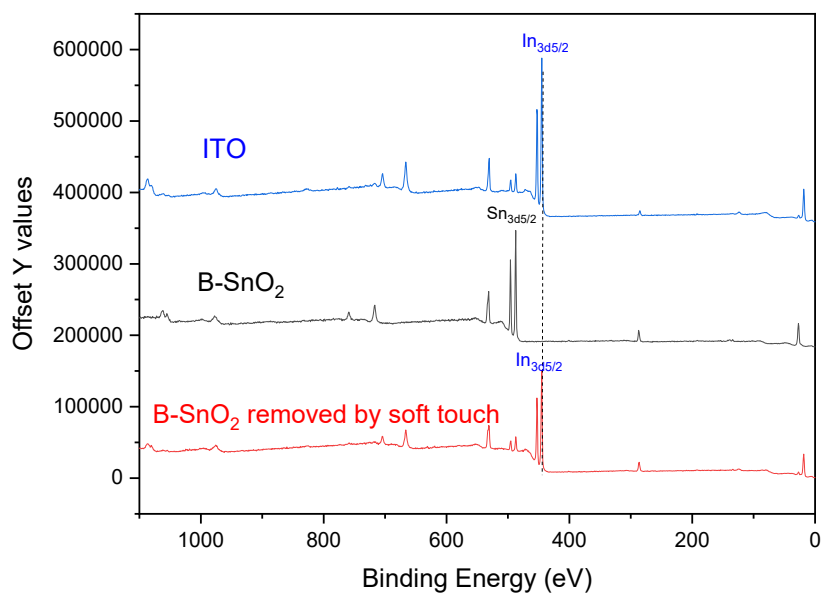

Figure S7: X-Ray Photoelectron spectroscopy of B-SnO<sub>2</sub> before and after soft touch

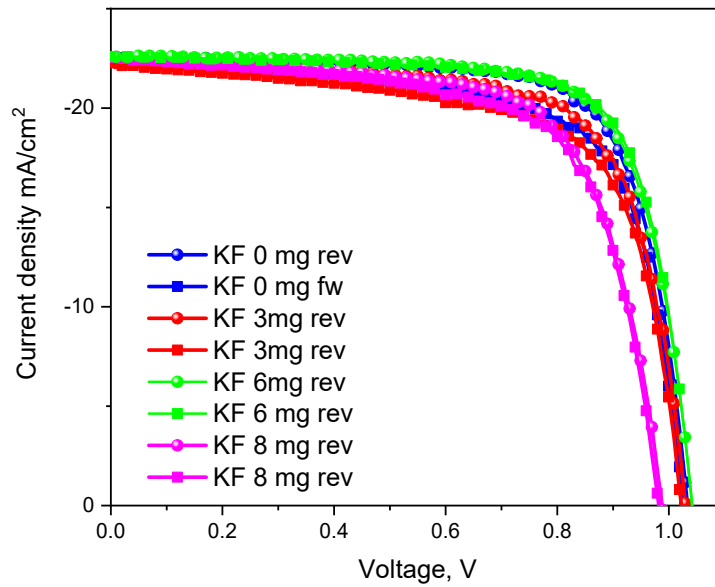

Figure S8: Best JV curves for different amounts of KF addition to SnO<sub>2</sub> dispersion.

Table S1 Parameters extracted from best JV Curves (Figure S8)

| Name       | Voc (V) | Jsc (mA/cm <sup>2</sup> ) | FF%  | PCE %       |
|------------|---------|---------------------------|------|-------------|
| KF (0)R    | 1.03    | -22.53                    | 73.6 | <b>17.1</b> |
| KF (0)F    | 1.02    | -22.55                    | 69.0 | <b>15.9</b> |
| KF (3 mg)R | 1.02    | -22.25                    | 71.1 | <b>16.3</b> |
| KF (3 mg)F | 1.02    | -22.24                    | 67.4 | <b>15.3</b> |
| KF (6 mg)R | 1.04    | -22.5                     | 74.6 | <b>17.5</b> |
| KF (6 mg)F | 1.04    | -22.5                     | 74   | <b>17.4</b> |
| KF (8 mg)R | 0.99    | -22.60                    | 68.2 | <b>15.2</b> |
| KF (8 mg)F | 0.98    | -22.55                    | 67.1 | <b>14.8</b> |

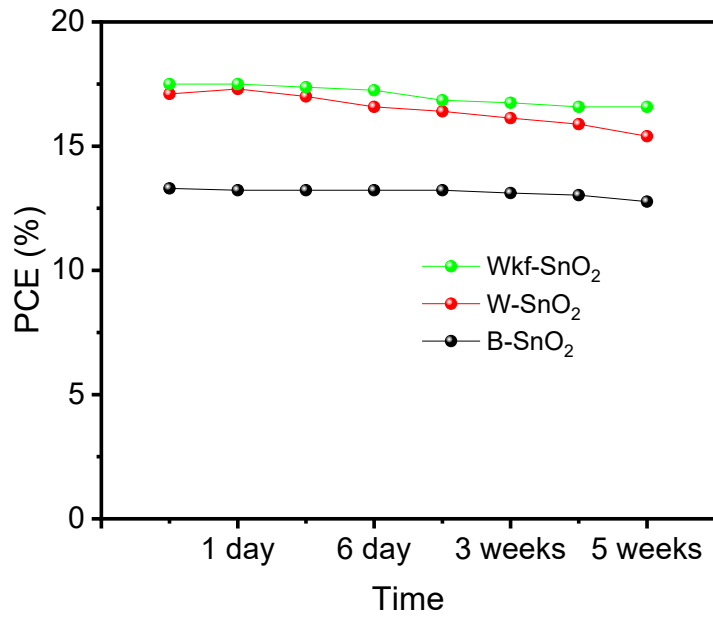

Figure S9: Stability of solar cells over several weeks. Conditions: storage in dry nitrogen atmosphere (< 10% RH) in the dark.

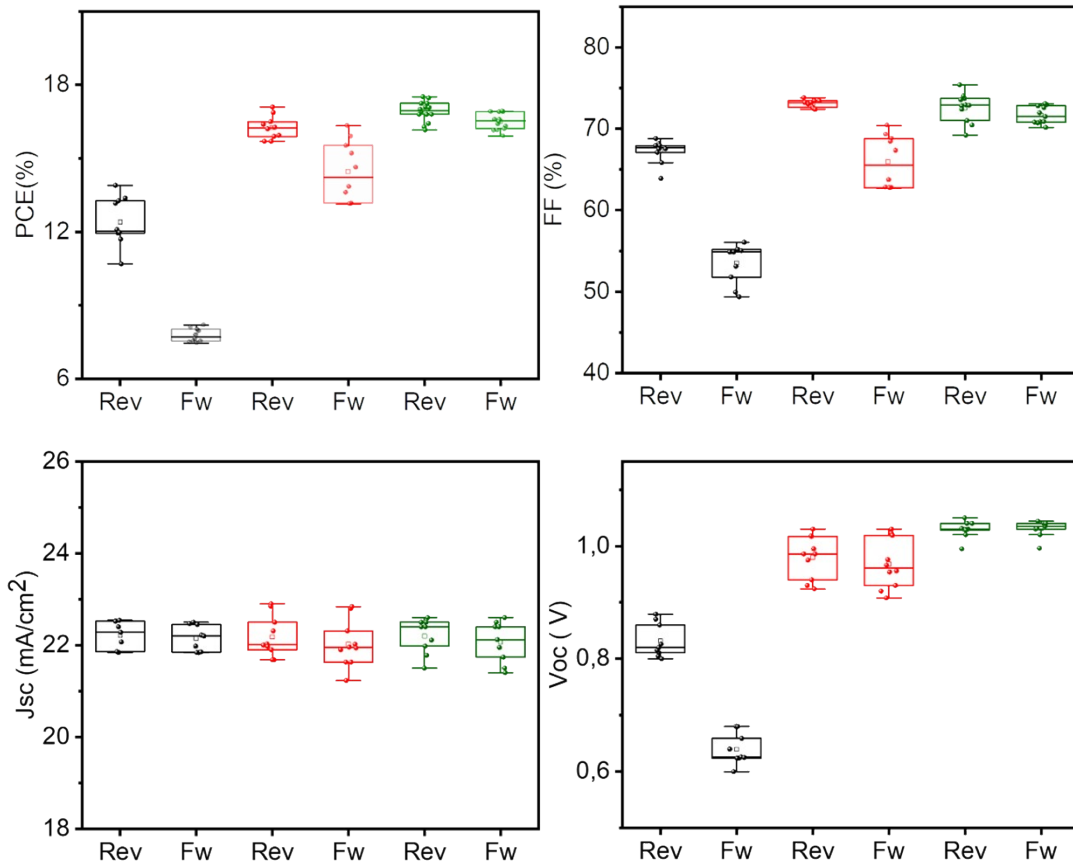

Figure S10: Statistical distribution of solar cell parameters (PCE, FF, Jsc and Voc) B-SnO<sub>2</sub> (Black), W-SnO<sub>2</sub>(Red), WKF-SnO<sub>2</sub>(Green)



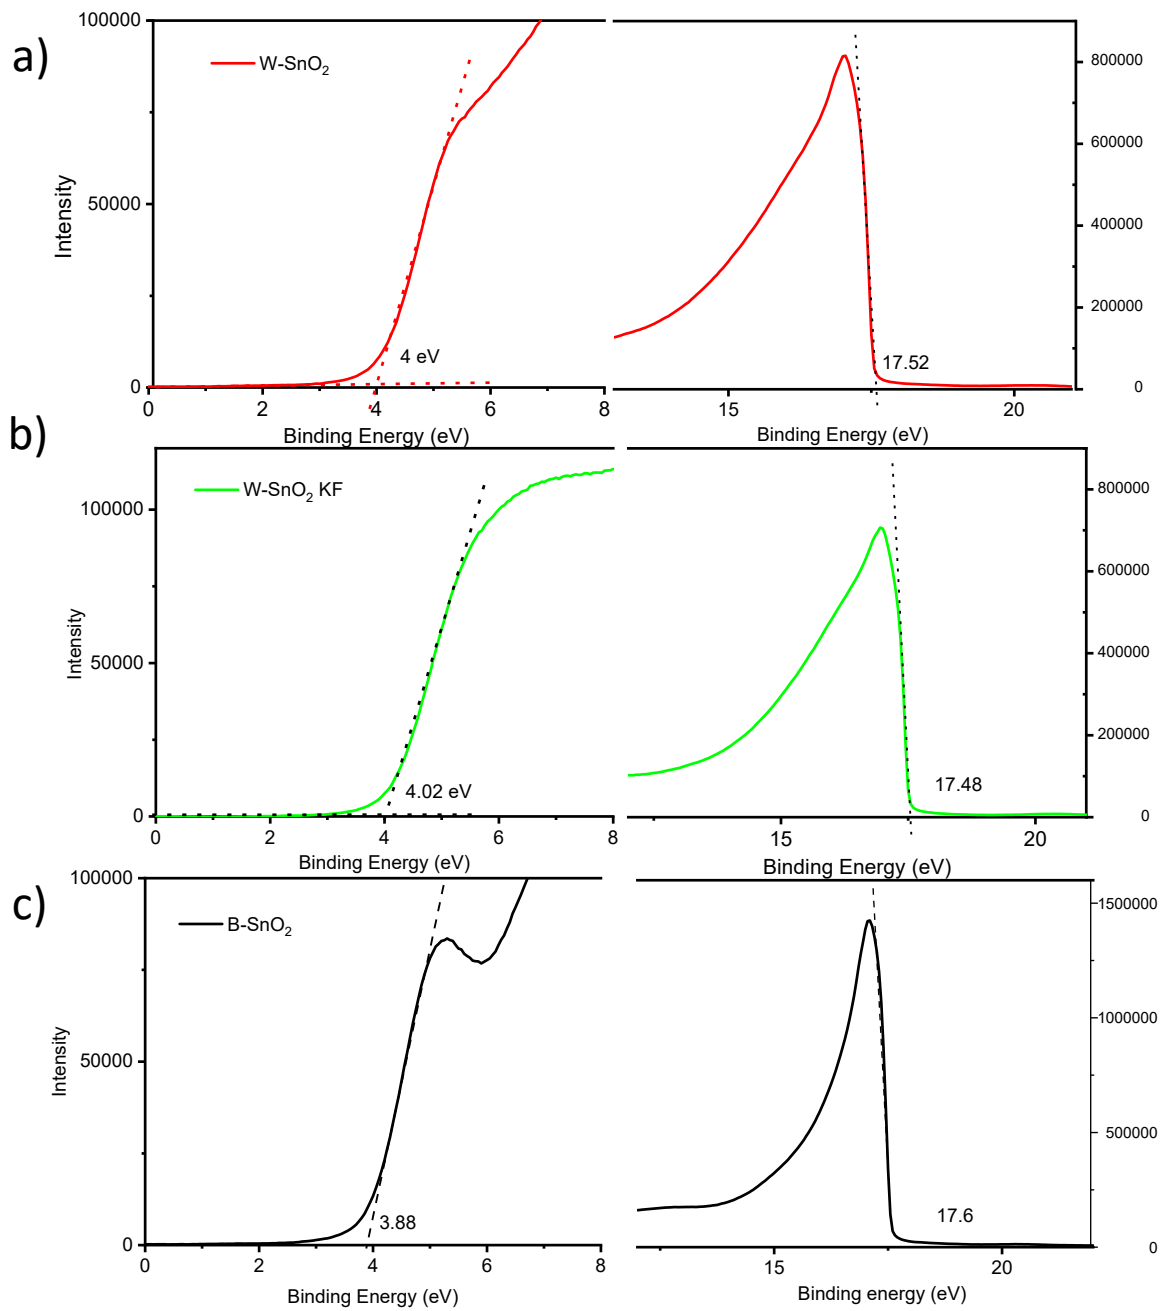

**Fig. S11** UPS spectra of valence band region (left) and secondary electron cutoff region (right) (a)  $W-SnO_2$ , (b)  $W-SnO_2-KF$  (c)  $B-SnO_2$  energy.

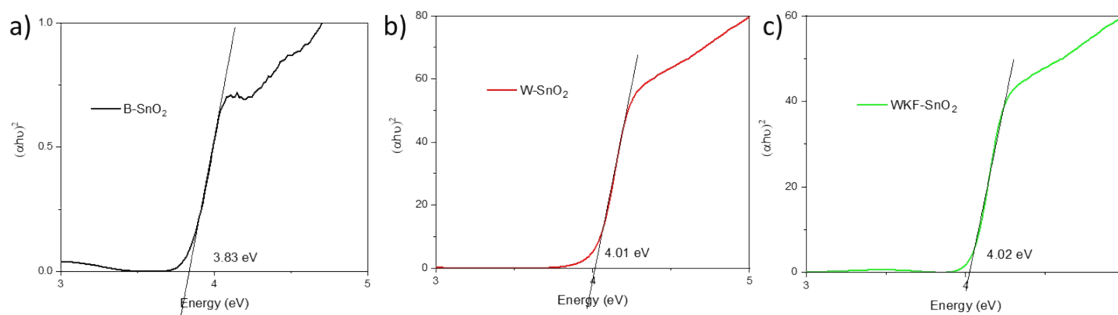

Fig. S12 Tauc plot a) B-SnO<sub>2</sub> b) W-SnO<sub>2</sub> c) WKF-SnO<sub>2</sub>

Table S2: UPS parameters for SnO<sub>2</sub> films

| Sample                | Ecutoff (eV) | Work function (Φ) | E <sub>VB</sub> (eV) | VBM (eV) | E <sub>g</sub> (eV) | CBM (eV) |
|-----------------------|--------------|-------------------|----------------------|----------|---------------------|----------|
| B-SnO <sub>2</sub>    | 17.60        | 3.62              | 3.88                 | 7.50     | 3.83                | 3.67     |
| W-SnO <sub>2</sub>    | 17.52        | 3.70              | 4.04                 | 7.74     | 4.01                | 3.73     |
| W-SnO <sub>2</sub> KF | 17.48        | 3.74              | 4.08                 | 7.82     | 4.02                | 3.81     |

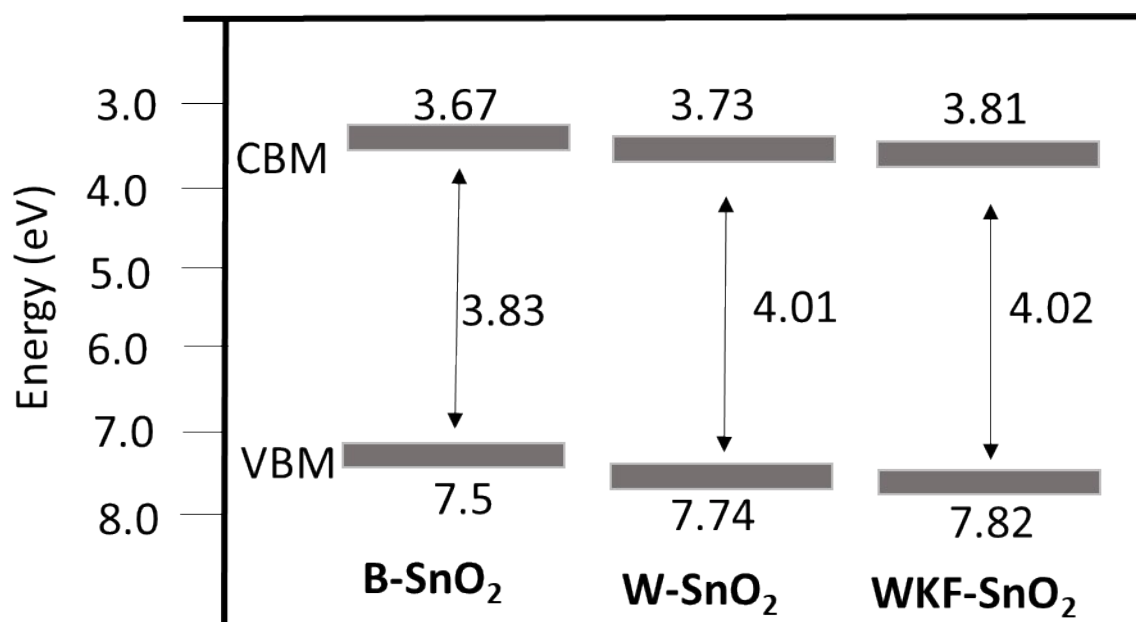

Fig S13: Energy diagram respect to the vacuum energy ( $E_{vac}$ ) summarizing the energy level extracted UPS spectra, optical bandgap ( $E_g$ ) (by UV-vis spectroscopy)

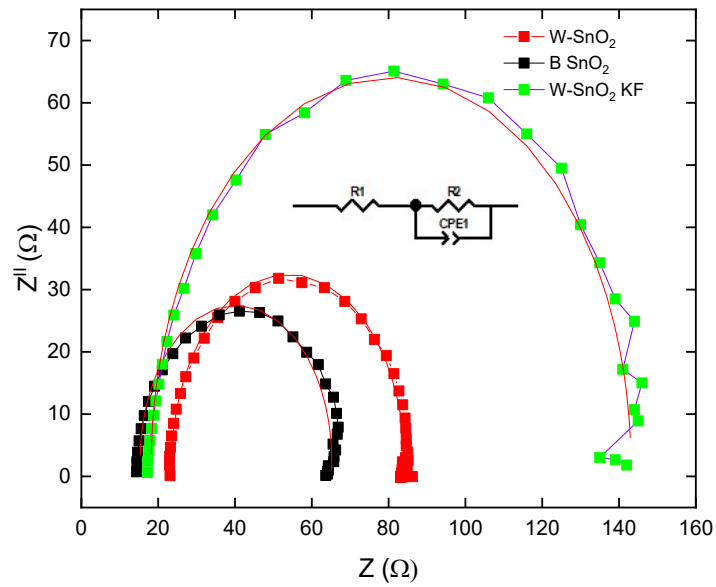

Fig. S14 Nyquist plot of SnO<sub>2</sub> measured at 0.80 V under the dark

Table S3. Series resistance and recombination resistance of Solar cells

| Sample                   | R <sub>s</sub> (Ω) | R <sub>rec</sub> (Ω) |
|--------------------------|--------------------|----------------------|
| WKF-SnO <sub>2</sub>     | 18.2               | 124.8                |
| <b>W-SnO<sub>2</sub></b> | <b>23.6</b>        | <b>60.3</b>          |
| B-SnO <sub>2</sub>       | 15.4               | 49.6                 |
